# Supplementary material
Source: PubMed Central journal article supplement (PMC7452032)
Supplement: mmc1.pdf [file mmc1.pdf]

## Supporting Information for

### Original Article

# D3Targets-2019-nCoV: a webserver for predicting drug targets and for multi-target and multi-site based virtual screening against COVID-19

Yulong Shi<sup>a,b,†</sup>, Xinben Zhang<sup>a,†</sup>, Kaijie Mu<sup>a,c,†</sup>, Cheng Peng<sup>a,b,†</sup>, Zhengdan Zhu<sup>a,b</sup>, Xiaoyu Wang<sup>a</sup>, Yanqing Yang<sup>a,b</sup>, Zhijian Xu<sup>a,b,\*</sup>, Weiliang Zhu<sup>a,b,\*</sup>

<sup>a</sup>*CAS Key Laboratory of Receptor Research; Drug Discovery and Design Center, Shanghai Institute of Materia Medica, Chinese Academy of Sciences, Shanghai 201203, China*

<sup>b</sup>*School of Pharmacy, University of Chinese Academy of Sciences, Beijing 100049, China*

<sup>c</sup>*Nano Science and Technology Institute, University of Science and Technology of China, Suzhou 215123, China*

Received 1 March 2020; received in revised form 23 March 2020; accepted 25 March 2020

\*Corresponding authors. Tel: +86 21 50806600-1201 (Zhijian Xu), +86 21 50805020 (Weiliang Zhu).

E-mail addresses: zjxu@simm.ac.cn (Zhijian Xu), wlzhu@simm.ac.cn (Weiliang Zhu).

†These authors made equal contributions to this work.

## CONTENTS

|                                                                                                                          |       |
|--------------------------------------------------------------------------------------------------------------------------|-------|
| <b>Table S1.</b> The coming or ongoing clinical studies against the SARS-CoV-2 from Chinese Clinical Trial Registry..... | - 2 - |
| <b>Table S2.</b> The biological functions of each protein target against the SARS-CoV-2. ....                            | - 6 - |
| <b>Table S3.</b> Scoring function weights and terms. ....                                                                | - 9 - |
| <b>References</b> .....                                                                                                  | - 9 - |

**Table S1.** The coming or ongoing clinical studies against the SARS-CoV-2 from Chinese Clinical Trial Registry<sup>a</sup>.

| No. | Registration number | Date of Registration | Intervention                                                                                                  |
|-----|---------------------|----------------------|---------------------------------------------------------------------------------------------------------------|
| 1.  | ChiCTR2000030333    | 2020-02-28           | Conventional standard treatment + Pirfenidone                                                                 |
| 2.  | ChiCTR2000030329    | 2020-02-28           | Umbilical cord blood CIK cells; Umbilical cord blood NK cells                                                 |
| 3.  | ChiCTR2000030314    | 2020-02-28           | Traditional Chinese medicine Ma-Xing-Shi-Gan-Tang and Sheng-Jiang-San                                         |
| 4.  | ChiCTR2000030312    | 2020-02-28           | Anti-SARS-CoV-2 virus inactivated plasma                                                                      |
| 5.  | ChiCTR2000030300    | 2020-02-28           | Mesenchymal stem cells therapy                                                                                |
| 6.  | ChiCTR2000030288    | 2020-02-27           | TCM formula and general treatment based on "Diagnosis and Treatment Program for COVID-19" (trial version 6th) |
| 7.  | ChiCTR2000030265    | 2020-02-26           | oXiris CRRT treatment                                                                                         |
| 8.  | ChiCTR2000030261    | 2020-02-26           | Aerosol inhalation of exosomes                                                                                |
| 9.  | ChiCTR2000030260    | 2020-02-26           | Enteral nutrition emulsion, tpf-t                                                                             |
| 10. | ChiCTR2000030259    | 2020-02-26           | Danorevir sodium tablets/ritonavir                                                                            |
| 11. | ChiCTR2000030255    | 2020-02-26           | Jing-Yin Granule                                                                                              |
| 12. | ChiCTR2000030254    | 2020-02-26           | Farpiravir tablets; Abidole tablets                                                                           |
| 13. | ChiCTR2000030224    | 2020-02-26           | Injecting Mesenchymal stem cells                                                                              |
| 14. | ChiCTR2000030215    | 2020-02-25           | Routine treatment + Kanguan No. 1; Routine treatment + Kanguan No. 2; Routine treatment + Kanguan No. 3       |
| 15. | ChiCTR2000030196    | 2020-02-25           | Conventional therapy + tocilizumab                                                                            |
| 16. | ChiCTR2000030187    | 2020-02-24           | Lopinavir and Ritonavir Tablets                                                                               |
| 17. | ChiCTR2000030179    | 2020-02-24           | Routine treatment + plasma treatment                                                                          |
| 18. | ChiCTR2000030173    | 2020-02-24           | Umbilical cord mesenchymal stem cells                                                                         |
| 19. | ChiCTR2000030170    | 2020-02-24           | Routine standard therapy + Jacketinib hydrochloride tablets                                                   |
| 20. | ChiCTR2000030165    | 2020-02-24           | Conventional treatment and ozonated autohemotherapy                                                           |
| 21. | ChiCTR2000030117    | 2020-02-23           | Xiyanping injection + conventional treatment; Lopinavir /Ritonavir tablets, alpha-interferon                  |
| 22. | ChiCTR2000030116    | 2020-02-23           | Different stem cell doses                                                                                     |
| 23. | ChiCTR2000030113    | 2020-02-23           | Keep ritonavir/ritonavir treatment; Favipiravir                                                               |
| 24. | ChiCTR2000030089    | 2020-02-22           | Conventional treatment and adalimumab                                                                         |
| 25. | ChiCTR2000030088    | 2020-02-22           | Iv injection of Wharton's Jelly mesenchymal stem cells                                                        |
| 26. | ChiCTR2000030082    | 2020-02-22           | Dihydroartemisinin piperazine tablets combined with antiviral treatment                                       |
| 27. | ChiCTR2000030058    | 2020-02-22           | Oral leflunomide                                                                                              |
| 28. | ChiCTR2000030054    | 2020-02-22           | Hydroxychloroquine sulfate; chloroquine phosphate                                                             |
| 29. | ChiCTR2000030046    | 2020-02-21           | Anti-2019-nCoV virus inactivated plasma                                                                       |
| 30. | ChiCTR2000030043    | 2020-02-21           | Conventional treatment and Shenfu injection                                                                   |
| 31. | ChiCTR2000030041    | 2020-02-21           | FNC                                                                                                           |
| 32. | ChiCTR2000030039    | 2020-02-21           | Conventional therapy with Infusion of convalescent                                                            |

|     |                  |            |                                                                                                                  |
|-----|------------------|------------|------------------------------------------------------------------------------------------------------------------|
|     |                  |            | plasma                                                                                                           |
| 33. | ChiCTR2000030034 | 2020-02-21 | TCM + Routine treatment of Western Medicine                                                                      |
| 34. | ChiCTR2000030033 | 2020-02-21 | Oral antiviral oral solution (Xiangxue Pharmaceutical);<br>Oral "Wu-Zhi-Fang-Guan-Fang" decoction                |
| 35. | ChiCTR2000030029 | 2020-02-21 | Suramin (IV.)                                                                                                    |
| 36. | ChiCTR2000030027 | 2020-02-20 | Western medicine routine treatment plan plus TCM<br>syndrome differentiation treatment                           |
| 37. | ChiCTR2000030020 | 2020-02-20 | Mesenchymal stem cells therapy                                                                                   |
| 38. | ChiCTR2000030010 | 2020-02-19 | Anti-SARS-CoV-2 virus inactivated plasma                                                                         |
| 39. | ChiCTR2000030003 | 2020-02-19 | Traditional Chinese Medicine prescription No. 1 and 2;<br>Gankeshuangqing capsule; Shuanghuanglian oral liquid   |
| 40. | ChiCTR2000030002 | 2020-02-19 | Conventional therapy and Tranilast                                                                               |
| 41. | ChiCTR2000030001 | 2020-02-19 | Basic treatment combined Triazavirin                                                                             |
| 42. | ChiCTR2000030000 | 2020-02-19 | Ganovo/ritonavir oral; Pegasys injection; Novaferon<br>intramuscular injection + Spray inhalation; Coriolus oral |
| 43. | ChiCTR2000029990 | 2020-02-18 | Mesenchymal stem cells                                                                                           |
| 44. | ChiCTR2000029989 | 2020-02-18 | Recombinant Human Interferon $\alpha$ 1b Eye Drops                                                               |
| 45. | ChiCTR2000029988 | 2020-02-18 | Chloroquine Phosphate                                                                                            |
| 46. | ChiCTR2000029974 | 2020-02-18 | Atic treatment medicines                                                                                         |
| 47. | ChiCTR2000029972 | 2020-02-17 | Ultra short wave Electrotherapy                                                                                  |
| 48. | ChiCTR2000029956 | 2020-02-17 | Health Guidance + Guixi Regulating Lung Gong Method +<br>Shenling Baizhu Powder + Moxibustion Treatment          |
| 49. | ChiCTR2000029947 | 2020-02-16 | Traditional Chinese medicine compound granules +<br>western medicine symptomatic treatment                       |
| 50. | ChiCTR2000029939 | 2020-02-16 | Conventional treatment combined with Chloroquine<br>Phosphate.                                                   |
| 51. | ChiCTR2000029935 | 2020-02-16 | Treated with conventional treatment combined with<br>Chloroquine Phosphate                                       |
| 52. | ChiCTR2000029895 | 2020-02-16 | Routine treatment + GD31                                                                                         |
| 53. | ChiCTR2000029868 | 2020-02-15 | Oral hydroxychloroquine sulfate tablets                                                                          |
| 54. | ChiCTR2000029855 | 2020-02-15 | Traditional Chinese medicine clear lung prescription and<br>compound houttuynia mixture treatment                |
| 55. | ChiCTR2000029853 | 2020-02-15 | Oral Azvudine tablets                                                                                            |
| 56. | ChiCTR2000029851 | 2020-02-15 | Conventional therapy and ALA                                                                                     |
| 57. | ChiCTR2000029850 | 2020-02-15 | Standardized comprehensive treatment combined with<br>convalescent plasma treatment                              |
| 58. | ChiCTR2000029849 | 2020-02-15 | Regulating intestinal flora + conventional treatment                                                             |
| 59. | ChiCTR2000029822 | 2020-02-14 | Honeysuckle decoction                                                                                            |
| 60. | ChiCTR2000029819 | 2020-02-14 | Conventional treatment + take Ba-Bao-Dan                                                                         |
| 61. | ChiCTR2000029818 | 2020-02-14 | Conventional treatment followed by Intravenous infusion<br>of Umbilical Cord Blood Plasma preparations           |
| 62. | ChiCTR2000029817 | 2020-02-14 | NK cells and mesenchymal stem                                                                                    |
| 63. | ChiCTR2000029816 | 2020-02-14 | Conventional treatment followed by Intravenous infusion<br>of Cord Blood Mesenchymal Stem Cells preparations     |

|     |                  |            |                                                                                                                               |
|-----|------------------|------------|-------------------------------------------------------------------------------------------------------------------------------|
| 64. | ChiCTR2000029814 | 2020-02-14 | Integrated Traditional Chinese and Western Medicine                                                                           |
| 65. | ChiCTR2000029813 | 2020-02-14 | Conventional Treatment & Tanreqing Capsules                                                                                   |
| 66. | ChiCTR2000029812 | 2020-02-14 | Conventional treatment followed by Intravenous infusion of Umbilical Cord Blood Mononuclear Cells preparations                |
| 67. | ChiCTR2000029811 | 2020-02-14 | Conventional treatment + Anti-aging Active Freeze-dried Powder Granules                                                       |
| 68. | ChiCTR2000029806 | 2020-02-14 | Thymosin for injection; Camrelizumab                                                                                          |
| 69. | ChiCTR2000029803 | 2020-02-14 | Hydroxychloroquine; Abidol hydrochloride                                                                                      |
| 70. | ChiCTR2000029790 | 2020-02-13 | Western medicine basic treatment combined with traditional Chinese medicine                                                   |
| 71. | ChiCTR2000029789 | 2020-02-13 | TCM based on symptomatic treatment                                                                                            |
| 72. | ChiCTR2000029788 | 2020-02-13 | Western medicine routine treatment plan plus TCM syndrome differentiation treatment                                           |
| 73. | ChiCTR2000029781 | 2020-02-13 | Routine treatment and Kangbingdu granules                                                                                     |
| 74. | ChiCTR2000029780 | 2020-02-13 | Routine treatment and Shenqi Fuzheng Injection                                                                                |
| 75. | ChiCTR2000029778 | 2020-02-13 | Herbal medicine and conventional treatment; QFPD seccion and conventional treatment; SFJD capsuale and conventional treatment |
| 76. | ChiCTR2000029777 | 2020-02-13 | Truncation and Torsion Formula and Routine treatment of Western Medicine                                                      |
| 77. | ChiCTR2000029776 | 2020-02-13 | Polyinosinic-Polycytidylic Acid Injection and conventional therapy                                                            |
| 78. | ChiCTR2000029769 | 2020-02-13 | Routine treatment + Babaodan capsule                                                                                          |
| 79. | ChiCTR2000029768 | 2020-02-13 | Diammonium Glycyrrhizinate Enteric-coated Capsules, Vitamin C tablets and clinical standard antiviral treatment               |
| 80. | ChiCTR2000029765 | 2020-02-13 | Conventional therapy + tocilizumab                                                                                            |
| 81. | ChiCTR2000029763 | 2020-02-12 | TCM and general treatment                                                                                                     |
| 82. | ChiCTR2000029761 | 2020-02-12 | Hydroxychloroquine and conventional therapy                                                                                   |
| 83. | ChiCTR2000029757 | 2020-02-12 | Conventional treatment and convalescent plasma therapy                                                                        |
| 84. | ChiCTR2000029756 | 2020-02-12 | Xiyanping injection; alpha-interferon                                                                                         |
| 85. | ChiCTR2000029747 | 2020-02-11 | Traditional Chinese Medicine                                                                                                  |
| 86. | ChiCTR2000029742 | 2020-02-11 | Normal Treatment plus Sodium Aescinate for Injection; Normal treatment plus hormonotherapy                                    |
| 87. | ChiCTR2000029741 | 2020-02-11 | Chloroquine Phosphate; Lopinavir/Ritonavir                                                                                    |
| 88. | ChiCTR2000029739 | 2020-02-11 | Hydrogen-Oxygen Nebulizer                                                                                                     |
| 89. | ChiCTR2000029656 | 2020-02-09 | Standard treatment and methylprednisolone for injection                                                                       |
| 90. | ChiCTR2000029639 | 2020-02-08 | Psychological intervention or drug intervention                                                                               |
| 91. | ChiCTR2000029636 | 2020-02-08 | Conventional standardized treatment and vMIP atomized inhalation                                                              |
| 92. | ChiCTR2000029609 | 2020-02-06 | Chloroquine phosphate plus Lopinavir/ritonavir                                                                                |
| 93. | ChiCTR2000029603 | 2020-02-06 | Conventional standardized treatment and ASC09/Ritonavir; Conventional standardized treatment and Lopinavir/Ritonavir          |
| 94. | ChiCTR2000029600 | 2020-02-06 | Alpha-Interferon atomization; Lopinavir and Ritonavir +                                                                       |

|      |                  |            |                                                                                                                |
|------|------------------|------------|----------------------------------------------------------------------------------------------------------------|
|      |                  |            | alpha-Interferon atomization; Favipiravir + alpha-Interferon atomization                                       |
| 95.  | ChiCTR2000029589 | 2020-02-05 | Reduning injection combined with basic western medical therapies                                               |
| 96.  | ChiCTR2000029580 | 2020-02-05 | Ruxolitinib combined with mesenchymal stem cell                                                                |
| 97.  | ChiCTR2000029578 | 2020-02-05 | Integrated Traditional Chinese and Western Medicine                                                            |
| 98.  | ChiCTR2000029573 | 2020-02-04 | Arbidol Tablets; Novaferon injection + Arbidol Tablets; Lopinavir/litonavir                                    |
| 99.  | ChiCTR2000029569 | 2020-02-04 | Conventional treatment combined with umbilical cord mesenchymal stem cell conditioned medium group             |
| 100. | ChiCTR2000029559 | 2020-02-04 | Hydroxychloroquine                                                                                             |
| 101. | ChiCTR2000029558 | 2020-02-04 | Chinese medicine treatment combined with western medicine treatment                                            |
| 102. | ChiCTR2000029550 | 2020-02-04 | Compound Yinchai granules, Qingqiao antiviral granules                                                         |
| 103. | ChiCTR2000029548 | 2020-02-04 | BaloxavirMarboxil; Favipiravir; Lopinavir-Ritonavir                                                            |
| 104. | ChiCTR2000029544 | 2020-02-03 | Baloxavir Marboxil tablets; favipiravir tablets                                                                |
| 105. | ChiCTR2000029542 | 2020-02-03 | Chloroquine + conventional management                                                                          |
| 106. | ChiCTR2000029541 | 2020-02-03 | DRV/c + Conventional treatment containing thymosin; LPV/r + Conventional treatment containing thymosin         |
| 107. | ChiCTR2000029539 | 2020-02-03 | Conventional standardized treatment and Lopinavir-Ritonavir                                                    |
| 108. | ChiCTR2000029518 | 2020-02-03 | TCM clinical prescription combined with the western medicine treatment                                         |
| 109. | ChiCTR2000029496 | 2020-02-03 | Recombinant cytokine gene-derived protein injection                                                            |
| 110. | ChiCTR2000029493 | 2020-02-02 | Traditional Chinese Medicine + basic western medical therapies                                                 |
| 111. | ChiCTR2000029487 | 2020-02-02 | Oral Gubiao Jiedu Ling Chinese medicine (Traditional Chinese Medicine)                                         |
| 112. | ChiCTR2000029468 | 2020-02-02 | Lopinavir/litonavir (LPV/r) + emtricitabine (FTC)/ Tenofovir alafenamide Fumarate tablets (TAF) in combination |
| 113. | ChiCTR2000029461 | 2020-02-02 | TCM decoctions + basic conventional therapy                                                                    |
| 114. | ChiCTR2000029439 | 2020-02-01 | TCM standard decoctions + basic western medical therapies                                                      |
| 115. | ChiCTR2000029438 | 2020-02-01 | Conventional medicine + TCM                                                                                    |
| 116. | ChiCTR2000029436 | 2020-02-01 | TCM syndrome differentiation treatment + Western medicine treatment                                            |
| 117. | ChiCTR2000029435 | 2020-02-01 | Traditional Chinese medicine                                                                                   |
| 118. | ChiCTR2000029434 | 2020-02-01 | Lian-Hua Qing-Wen Capsule/Granule (TCM) + Routine treatment                                                    |
| 119. | ChiCTR2000029432 | 2020-02-01 | Tanreqing Injection (TCM)                                                                                      |
| 120. | ChiCTR2000029431 | 2020-02-01 | Critical Treatment in Critical Period + Ankylosaurus + M1 (type I macrophage) suppression therapy              |
| 121. | ChiCTR2000029418 | 2020-01-30 | Combined Treatment of Chinese medicine and western                                                             |

|      |                  |            |                                                                                                                       |
|------|------------------|------------|-----------------------------------------------------------------------------------------------------------------------|
|      |                  |            | medicine                                                                                                              |
| 122. | ChiCTR2000029400 | 2020-01-29 | Traditional Chinese medicine treatment                                                                                |
| 123. | ChiCTR2000029387 | 2020-01-28 | Ribavirin + Interferon alpha-1b; lopinavir / ritonavir + interferon alpha-1b; Ribavirin + LPV/r + Interferon alpha-1b |
| 124. | ChiCTR2000029386 | 2020-01-28 | Adjunctive Corticosteroid Therapy                                                                                     |
| 125. | ChiCTR2000029381 | 2020-01-27 | Xuebijing Injection (TCM)                                                                                             |
| 126. | ChiCTR2000029308 | 2020-01-23 | Lopinavir-ritonavir tablets + interferon- $\alpha$ 2b                                                                 |

<sup>a</sup>Access to <http://www.chictr.org.cn/enIndex.aspx> on 2020-02-29.

**Table S2.** The biological functions of each protein target against the SARS-CoV-2.

| Target full name                | Target abbreviation | Function                                                                                                                                                               | Ref. |
|---------------------------------|---------------------|------------------------------------------------------------------------------------------------------------------------------------------------------------------------|------|
| Host translation inhibitor nsp1 | Nsp1                | Nsp1 can facilitate efficient viral gene expression and evasion from host immune response by suppressing host gene expression.                                         | 1, 2 |
| Non-structural protein 2        | Nsp2                | Nsp2 may be involved in the disruption of intracellular host signaling during viral infections.                                                                        | 3    |
| Papain-like proteinase          | PLP/PLpro           | PLP is responsible for the cleavage of nsp 1, 2 and 3. And PLP can deubiquitinate or deISGylate host cell proteins, resulting in the immune suppression of host cells. | 4, 5 |
| ADP ribose phosphatase          | ADRP                |                                                                                                                                                                        |      |
| Non-structural protein 4        | Nsp4                | Nsp4 participates in the assembly of virally-induced cytoplasmic double-membrane vesicles, which is necessary for viral replication.                                   | 6    |
| 3C-like proteinase              | 3CLpro/Mpro         | 3CLpro can cleave the virus-encoded polyproteins, which is important for polyprotein maturation.                                                                       | 7    |
| Non-structural protein 6        | Nsp6                | Nsp6 can limit autophagosome expansion, which may favor coronavirus infection.                                                                                         | 8    |
| Non-structural protein 7        | Nsp7                | Nsp7 can form a hexadecamer with nsp8 that may participate in viral replication by acting as a primase.                                                                | 9    |
| Non-structural protein 8        | Nsp8                | Nsp8 can form a hexadecamer with nsp7 that may participate in viral replication by acting as a primase.                                                                | 9    |
| Non-structural protein 9        | Nsp9                | Nsp9 is essential for efficient viral                                                                                                                                  | 10   |

|                                     |                      |                                                                                                                                                                                                                                             |        |
|-------------------------------------|----------------------|---------------------------------------------------------------------------------------------------------------------------------------------------------------------------------------------------------------------------------------------|--------|
|                                     |                      | growth and may participate in viral replication.                                                                                                                                                                                            |        |
| Non-structural protein 10           | Nsp10                | Nsp10 plays a pivotal role in viral transcription.                                                                                                                                                                                          | 11     |
| RNA-dependent RNA polymerase        | RdRp                 | RdRp is responsible for replication and transcription of the viral RNA genome.                                                                                                                                                              | 12     |
| Helicase                            | /                    | Helicase plays a vital role in catalyzing the unwinding of duplex oligonucleotides into single strands in an NTP-dependent manner.                                                                                                          | 13     |
| Guanine-N7 methyltransferase        | N7-MTase             | N7-MTase is a bifunctional enzyme able to methylate the viral RNA cap and excise erroneous mutagenic nucleotides.                                                                                                                           | 11,14  |
| Uridylate-specific endoribonuclease | NendoU               | NendoU is a Mn <sup>2+</sup> -dependent, uridylate-specific enzyme, which leaves 2'-3'-cyclic phosphates 5' to the cleaved bond.                                                                                                            | 15     |
| 2'-O-methyltransferase              | 2'-O-Mtase           | 2'-O-Mtase can mediate mRNA cap 2'-O-ribose methylation to the 5'-cap structure of viral mRNAs which is essential for evasion from host immune response.                                                                                    | 16,17  |
| ORF7a protein                       | /                    | ORF7a can induce apoptosis via a caspase-dependent pathway.                                                                                                                                                                                 | 18     |
| Spike protein                       | S protein            | S protein comprises two functional subunits responsible for binding to the host cell receptor (S1 subunit) and fusion of the viral and cellular membranes (S2 subunit).                                                                     | 19, 20 |
| Spike protein-S2 subunit            | S protein-S2 subunit | SARS-CoV-2 S protein-S2 subunit is crucial for mediating virus fusion and entry.                                                                                                                                                            | 21     |
| Spike protein-heptad repeat 1       | S-HR1                | SARS-CoV-2 S-HR1 plays an important role of mediating virus fusion and entry.                                                                                                                                                               | 21     |
| Envelope protein                    | E protein            | E protein plays a central role in virus morphogenesis and assembly, as well as the induction of apoptosis.                                                                                                                                  | 22,23  |
| Nucleocapsid phosphoprotein         | N protein            | N protein plays a fundamental role during virion assembly through its interactions with the viral genome and membrane protein M. Besides, it can enhance the efficiency of subgenomic viral RNA transcription as well as viral replication. | 24,25  |

|                                                                |              |                                                                                                                                |    |
|----------------------------------------------------------------|--------------|--------------------------------------------------------------------------------------------------------------------------------|----|
| AP2-associated protein kinase 1                                | AAK1         | AAK1 could promote endocytosis, which is involved in viral entry.                                                              | 26 |
| C-type lectin domain family 4 member M                         | CLEC4M       | CLEC4M can mediate infection by coronavirus.                                                                                   | 27 |
| Cyclophilin A                                                  | CypA         | Cyclophilin A is required for coronavirus replication.                                                                         | 28 |
| Disintegrin and metalloproteinase domain-containing protein 17 | ADAM17       | ADAM17 plays a role in the proteolytic processing of ACE2.                                                                     | 29 |
| Tyrosine-protein kinase ABL2                                   | ABL2         | ABL2 is required for coronavirus replication.                                                                                  | 30 |
| Eukaryotic initiation factor 4A-I                              | eIF4A        | EIF4a is involved in protein translation.                                                                                      | 31 |
| Dihydroorotate dehydrogenase                                   | DHODH        | DHODH is required for coronavirus replication.                                                                                 | 32 |
| Furin                                                          | Furin        | Furin is responsible for cutting the S protein of SARS-CoV-2, which is involved in viral entry.                                | 33 |
| Angiotensin converting enzyme 2                                | ACE2         | ACE2 is the receptor of S protein of SARS-CoV-2.                                                                               | 34 |
| Cathepsin L                                                    | CTSL         | CTSL activates coronavirus membrane fusion.                                                                                    | 35 |
| Transmembrane protease serine 2                                | TMPRSS2      | TMPRSS2 activation induces virus-cell membrane fusion at the cell surface.                                                     | 36 |
| Glycogen synthase kinase-3 beta                                | GSK3 $\beta$ | GSK3 $\beta$ regulates the phosphorylation of SARS-CoV nucleocapsid protein and viral replication.                             | 37 |
| Heterogeneous nuclear ribonucleoprotein A1                     | HNRNPA1      | HNRNPA1 can bind to the N protein of SARS-CoV, which may be involved in the regulation of coronavirus RNA synthesis.           | 38 |
| Calnexin                                                       | /            | Calnexin strictly monitors the maturation of S protein by its direct binding, resulting in conferring infectivity on SARS-CoV. | 39 |
| Caveolin-2                                                     | CAV2         | CAV2 may be involved in replication and transmission of the virus by acting on cell membranes.                                 | 40 |
| Mitogen-activated protein kinase 8                             | JNK1         | Persistent SARS-CoV infection needs JNK and PI3k/Akt signaling pathways.                                                       | 41 |
| Mitogen-activated protein kinase 9                             | JNK2         | JNK2 is required for persistent viral infection.                                                                               | 41 |
| Mitogen-activated protein kinase 10                            | JNK3         | JNK3 is required for persistent viral infection.                                                                               | 41 |



|                                                    |      |                                                                                                                  |    |
|----------------------------------------------------|------|------------------------------------------------------------------------------------------------------------------|----|
| kinase 10                                          |      | infection.                                                                                                       |    |
| RAC-alpha<br>serine/threonine-protein<br>kinase    | AKT1 | Persistent SARS-CoV infection needs<br>JNK and PI3k/Akt signaling pathways.                                      | 41 |
| RAC-beta<br>serine/threonine-protein<br>kinase     | AKT2 | AKT2 is required for persistent viral<br>infection.                                                              | 41 |
| RAC-gamma<br>serine/threonine-protein<br>kinase    | AKT3 | AKT3 is required for persistent viral<br>infection.                                                              | 41 |
| cGMP-specific<br>3',5'-cyclic<br>phosphodiesterase | PDE5 | PDEs is responsible for the degradation<br>of cAMP, which may aggravate the<br>virus-induced pulmonary fibrosis. | 42 |

**Table S3.** Scoring function weights and terms.

| Weight    | Term                                                                  |
|-----------|-----------------------------------------------------------------------|
| -0.035579 | gauss1                                                                |
| -0.005156 | gauss2                                                                |
| 0.840245  | Repulsion                                                             |
| -0.035069 | Hydrophobic                                                           |
| -0.587439 | Hydrogen bonding                                                      |
| 1.923     | Number of active rotatable bonds between heavy<br>atoms in the ligand |
| -0.3      | gaussian potential between magnesium and<br>oxygen                    |

The conformation-independent function  $g$  can be described as follows.

$$c_{inter} = weight * term \quad (1)$$

$$g(c_{inter}) = \frac{c_{inter}}{1+wN_{rot}} \quad (2)$$

where  $N_{rot}$  is the number of active rotatable bonds between heavy atoms in the ligand and  $w$  is the associated weight.

## References

1. Lokugamage KG, Narayanan K, Huang C, Makino S. Severe acute respiratory

- syndrome coronavirus protein nsp1 is a novel eukaryotic translation inhibitor that represses multiple steps of translation initiation. *J Virol* 2012; **86**: 13598-608.
2. Tanaka T, Kamitani W, DeDiego ML, Enjuanes L, Matsuura Y. Severe acute respiratory syndrome coronavirus nsp1 facilitates efficient propagation in cells through a specific translational shutoff of host mRNA. *J Virol* 2012; **86**: 11128-37.
  3. Cornillez-Ty CT, Liao L, Yates JR, 3rd, Kuhn P, Buchmeier MJ. Severe acute respiratory syndrome coronavirus nonstructural protein 2 interacts with a host protein complex involved in mitochondrial biogenesis and intracellular signaling. *J Virol* 2009; **83**: 10314-8.
  4. Clementz MA, Chen Z, Banach BS, Wang Y, Sun L, Ratia K, *et al.* Deubiquitinating and interferon antagonism activities of coronavirus papain-like proteases. *J Virol* 2010; **84**: 4619-29.
  5. Frieman M, Ratia K, Johnston RE, Mesecar AD, Baric RS. Severe acute respiratory syndrome coronavirus papain-like protease ubiquitin-like domain and catalytic domain regulate antagonism of IRF3 and NF-kappaB signaling. *J Virol* 2009; **83**: 6689-705.
  6. Angelini MM, Akhlaghpour M, Neuman BW, Buchmeier MJ. Severe acute respiratory syndrome coronavirus nonstructural proteins 3, 4, and 6 induce double-membrane vesicles. *mBio* 2013; **4**.
  7. Hsu MF, Kuo CJ, Chang KT, Chang HC, Chou CC, Ko TP, *et al.* Mechanism of the maturation process of SARS-CoV 3CL protease. *J Biol Chem* 2005; **280**: 31257-66.
  8. Cottam EM, Whelband MC, Wileman T. Coronavirus NSP6 restricts autophagosome expansion. *Autophagy* 2014; **10**: 1426-41.
  9. te Velthuis AJ, van den Worm SH, Snijder EJ. The SARS-coronavirus nsp7+nsp8 complex is a unique multimeric RNA polymerase capable of both de novo initiation and primer extension. *Nucleic Acids Res* 2012; **40**: 1737-47.
  10. Miknis ZJ, Donaldson EF, Umland TC, Rimmer RA, Baric RS, Schultz LW. Severe acute respiratory syndrome coronavirus nsp9 dimerization is essential for efficient viral growth. *J Virol* 2009; **83**: 3007-18.
  11. Bouvet M, Imbert I, Subissi L, Gluais L, Canard B, Decroly E. RNA 3'-end mismatch excision by the severe acute respiratory syndrome coronavirus

- nonstructural protein nsp10/nsp14 exoribonuclease complex. *Proc Natl Acad Sci U S A* 2012; **109**: 9372-7.
12. Ahn DG, Choi JK, Taylor DR, Oh JW. Biochemical characterization of a recombinant SARS coronavirus nsp12 RNA-dependent RNA polymerase capable of copying viral RNA templates. *Arch Virol* 2012; **157**: 2095-104.
  13. Jia Z, Yan L, Ren Z, Wu L, Wang J, Guo J, *et al.* Delicate structural coordination of the Severe Acute Respiratory Syndrome coronavirus Nsp13 upon ATP hydrolysis. *Nucleic Acids Res* 2019; **47**: 6538-50.
  14. Ferron F, Subissi L, Silveira De Moraes AT, Le NTT, Sevajol M, Gluais L, *et al.* Structural and molecular basis of mismatch correction and ribavirin excision from coronavirus RNA. *Proc Natl Acad Sci U S A* 2018; **115**: E162-E71.
  15. Ricagno S, Egloff MP, Ulferts R, Coutard B, Nurizzo D, Campanacci V, *et al.* Crystal structure and mechanistic determinants of SARS coronavirus nonstructural protein 15 define an endoribonuclease family. *Proc Natl Acad Sci U S A* 2006; **103**: 11892-7.
  16. Decroly E, Debarnot C, Ferron F, Bouvet M, Coutard B, Imbert I, *et al.* Crystal structure and functional analysis of the SARS-coronavirus RNA cap 2'-O-methyltransferase nsp10/nsp16 complex. *PLoS Pathog* 2011; **7**: e1002059.
  17. Decroly E, Imbert I, Coutard B, Bouvet M, Selisko B, Alvarez K, *et al.* Coronavirus nonstructural protein 16 is a cap-0 binding enzyme possessing (nucleoside-2'O)-methyltransferase activity. *J Virol* 2008; **82**: 8071-84.
  18. Tan YJ, Fielding BC, Goh PY, Shen S, Tan TH, Lim SG, *et al.* Overexpression of 7a, a protein specifically encoded by the severe acute respiratory syndrome coronavirus, induces apoptosis via a caspase-dependent pathway. *J Virol* 2004; **78**: 14043-7.
  19. Walls AC, Park YJ, Tortorici MA, Wall A, McGuire AT, Velesler D. Structure, Function, and Antigenicity of the SARS-CoV-2 Spike Glycoprotein. *Cell* 2020.
  20. Belouzard S, Chu VC, Whittaker GR. Activation of the SARS coronavirus spike protein via sequential proteolytic cleavage at two distinct sites. *Proc Natl Acad Sci U S A* 2009; **106**: 5871-6.
  21. Xia S, Zhu Y, Liu M, Lan Q, Xu W, Wu Y, *et al.* Fusion mechanism of

- 2019-nCoV and fusion inhibitors targeting HR1 domain in spike protein. *Cell Mol Immunol* 2020. doi: 10.1038/s41423-020-0374-2.
22. Li Y, Surya W, Claudine S, Torres J. Structure of a conserved Golgi complex-targeting signal in coronavirus envelope proteins. *J Biol Chem* 2014; **289**: 12535-49.
  23. Surya W, Li Y, Torres J. Structural model of the SARS coronavirus E channel in LMPG micelles. *Biochim Biophys Acta Biomembr* 2018; **1860**: 1309-17.
  24. Stertz S, Reichelt M, Spiegel M, Kuri T, Martinez-Sobrido L, Garcia-Sastre A, *et al.* The intracellular sites of early replication and budding of SARS-coronavirus. *Virology* 2007; **361**: 304-15.
  25. Saikatendu KS, Joseph JS, Subramanian V, Neuman BW, Buchmeier MJ, Stevens RC, *et al.* Ribonucleocapsid formation of severe acute respiratory syndrome coronavirus through molecular action of the N-terminal domain of N protein. *J Virol* 2007; **81**: 3913-21.
  26. Richardson P, Griffin I, Tucker C, Smith D, Oechsle O, Phelan A, *et al.* Baricitinib as potential treatment for 2019-nCoV acute respiratory disease. *Lancet* 2020; **395**: e30-e1.
  27. Jeffers SA, Tusell SM, Gillim-Ross L, Hemmila EM, Achenbach JE, Babcock GJ, *et al.* CD209L (L-SIGN) is a receptor for severe acute respiratory syndrome coronavirus. *Proc Natl Acad Sci U S A* 2004; **101**: 15748-53.
  28. Ma-Lauer Y, Zheng Y, Malesevic M, von Brunn B, Fischer G, von Brunn A. Influences of cyclosporin A and non-immunosuppressive derivatives on cellular cyclophilins and viral nucleocapsid protein during human coronavirus 229E replication. *Antiviral Res* 2020; **173**: 104620.
  29. Heurich A, Hofmann-Winkler H, Gierer S, Liepold T, Jahn O, Pohlmann S. TMPRSS2 and ADAM17 cleave ACE2 differentially and only proteolysis by TMPRSS2 augments entry driven by the severe acute respiratory syndrome coronavirus spike protein. *J Virol* 2014; **88**: 1293-307.
  30. Coleman CM, Sisk JM, Mingo RM, Nelson EA, White JM, Frieman MB. Abelson Kinase Inhibitors Are Potent Inhibitors of Severe Acute Respiratory Syndrome Coronavirus and Middle East Respiratory Syndrome Coronavirus Fusion. *J Virol* 2016; **90**: 8924-33.
  31. Muller C, Schulte FW, Lange-Grunweller K, Obermann W, Madhugiri R, Pleschka S, *et al.* Broad-spectrum antiviral activity of the eIF4A inhibitor

- silvestrol against corona- and picornaviruses. *Antiviral Res* 2018; **150**: 123-9.
32. Cheung NN, Lai KK, Dai J, Kok KH, Chen H, Chan KH, *et al.* Broad-spectrum inhibition of common respiratory RNA viruses by a pyrimidine synthesis inhibitor with involvement of the host antiviral response. *J Gen Virol* 2017; **98**: 946-54.
  33. Coutard B, Valle C, de Lamballerie X, Canard B, Seidah NG, Decroly E. The spike glycoprotein of the new coronavirus 2019-nCoV contains a furin-like cleavage site absent in CoV of the same clade. *Antiviral Res* 2020; **176**: 104742.
  34. Li W, Moore MJ, Vasilieva N, Sui J, Wong SK, Berne MA, *et al.* Angiotensin-converting enzyme 2 is a functional receptor for the SARS coronavirus. *Nature* 2003; **426**: 450-4.
  35. Simmons G, Gosalia DN, Rennekamp AJ, Reeves JD, Diamond SL, Bates P. Inhibitors of cathepsin L prevent severe acute respiratory syndrome coronavirus entry. *Proc Natl Acad Sci U S A* 2005; **102**: 11876-81.
  36. Kawase M, Shirato K, van der Hoek L, Taguchi F, Matsuyama S. Simultaneous treatment of human bronchial epithelial cells with serine and cysteine protease inhibitors prevents severe acute respiratory syndrome coronavirus entry. *J Virol* 2012; **86**: 6537-45.
  37. Wu CH, Yeh SH, Tsay YG, Shieh YH, Kao CL, Chen YS, *et al.* Glycogen synthase kinase-3 regulates the phosphorylation of severe acute respiratory syndrome coronavirus nucleocapsid protein and viral replication. *J Biol Chem* 2009; **284**: 5229-39.
  38. Luo H, Chen Q, Chen J, Chen K, Shen X, Jiang H. The nucleocapsid protein of SARS coronavirus has a high binding affinity to the human cellular heterogeneous nuclear ribonucleoprotein A1. *FEBS Lett* 2005; **579**: 2623-8.
  39. Fukushi M, Yoshinaka Y, Matsuoka Y, Hatakeyama S, Ishizaka Y, Kirikae T, *et al.* Monitoring of S protein maturation in the endoplasmic reticulum by calnexin is important for the infectivity of severe acute respiratory syndrome coronavirus. *J Virol* 2012; **86**: 11745-53.
  40. Zhao Y, Zhao Z, Wang Y, Zhou Y, Ma Y, Zuo W. Single-cell RNA expression profiling of ACE2, the putative receptor of Wuhan 2019-nCoV. *bioRxiv* 2020. doi: 10.1101/2020.01.26.919985.
  41. Mizutani T, Fukushi S, Saijo M, Kurane I, Morikawa S. JNK and PI3k/Akt

signaling pathways are required for establishing persistent SARS-CoV infection in Vero E6 cells. *Biochim Biophys Acta* 2005; **1741**: 4-10.

42. Liu X, Li Z, Liu S, Chen Z, Zhao Z, Huang Y-y, *et al.* Therapeutic effects of dipyridamole on COVID-19 patients with coagulation dysfunction. *medRxiv* 2020. doi: 10.1101/2020.02.27.20027557.
